# Supplementary material
Source: Springer Nature journal article supplement (https://www.springermedizin.de/resource/supplementary/12885_2009_2191_MOESM7_ESM.pdf/9460724)

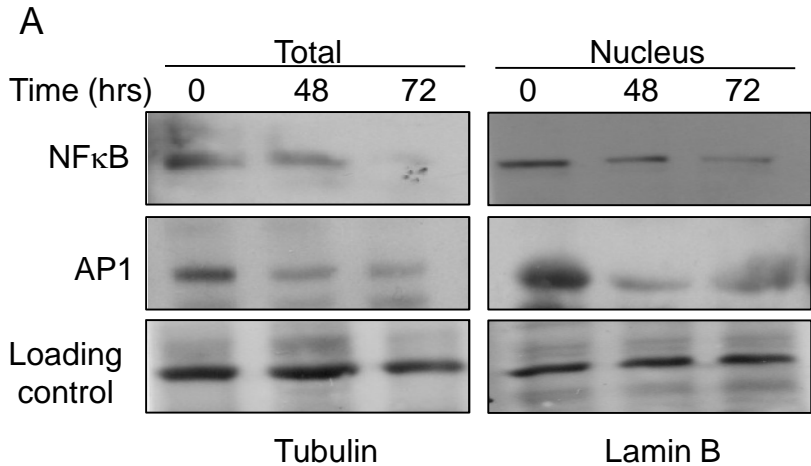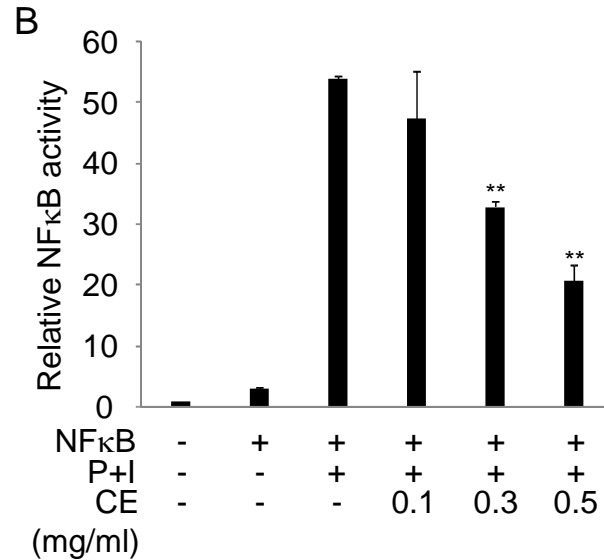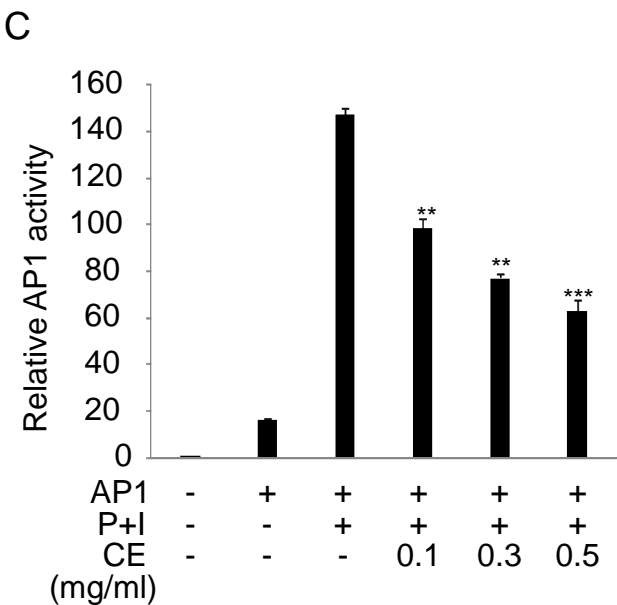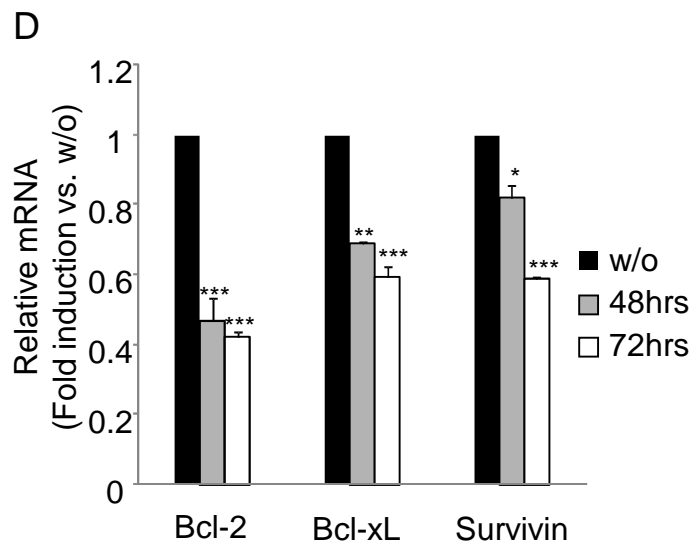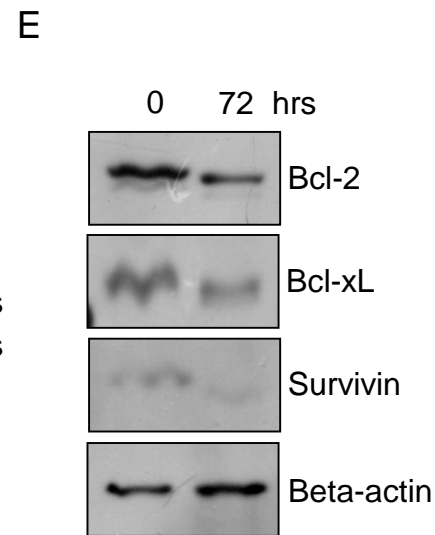

Supplement: MOESM7 [file 9460724]
